# Supplementary material
Source: PubMed Central journal article supplement (PMC2782027)
Supplement: supp_M109.033530_jbc.M109.033530-1.pdf [file supp_M109.033530_jbc.M109.033530-1.pdf]

Supplementary Figure 1: Effect of Dominant-negative mTOR on the Phosphorylation of STAT1:

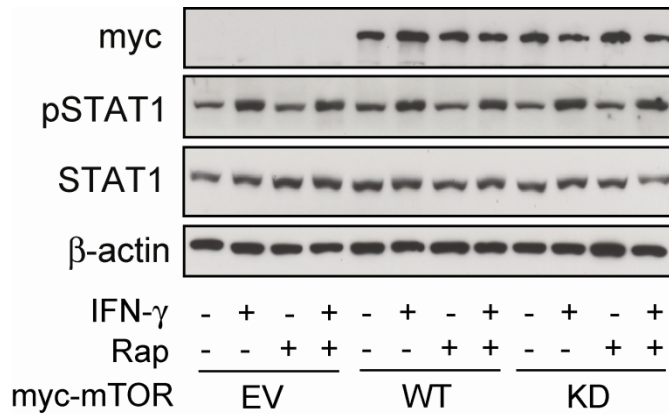

Supplementary Figure 1: HEK 293T cells expressing myc-tagged wild-type (WT) or kinase-dead (KD) mTOR, were serum-deprived for 1 h in the absence or presence of rapamycin before incubation without or with IFN- $\gamma$  for 30 min. Proteins from whole cell lysates were separated by SDS-PAGE and detected by Western blot analysis. Samples from the same experiment were used for immunoprecipitation of myc-mTOR-associated proteins (Figure 1E). Results are representative of 3 individual experiments.

Supplementary Figure 2: Protein Fragment Complementation Assay:

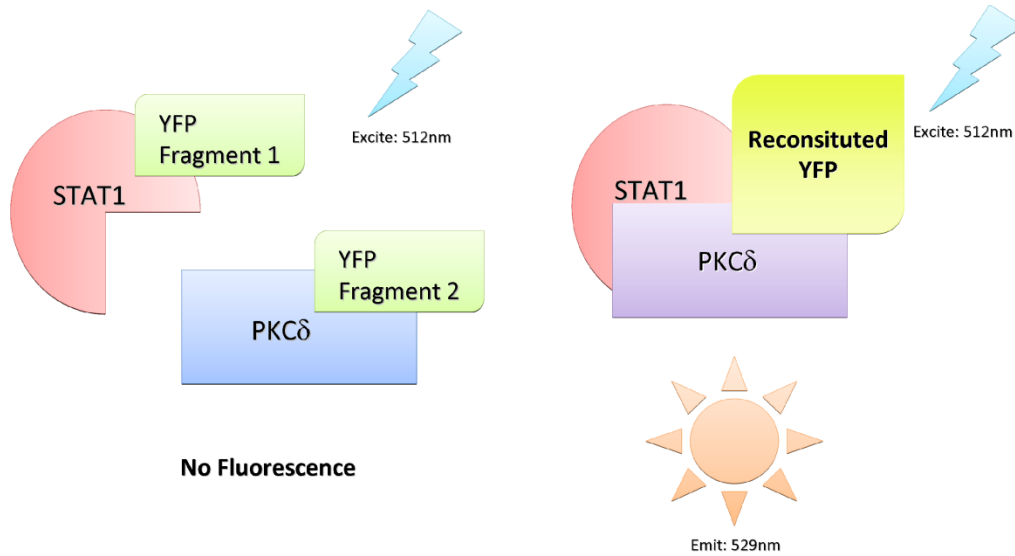

Supplementary Figure 2: STAT1 and PKC $\delta$ , each linked to complementary fragments of yellow fluorescent protein (YFP) were expressed in A549 cells. Physical interaction of the recombinant proteins leads to reconstitution of active YFP permitting detection by fluorescence microscopy.

Supplementary Figure 3: Efficacy and Specificity of Pooled and Single siRNA Duplexes:

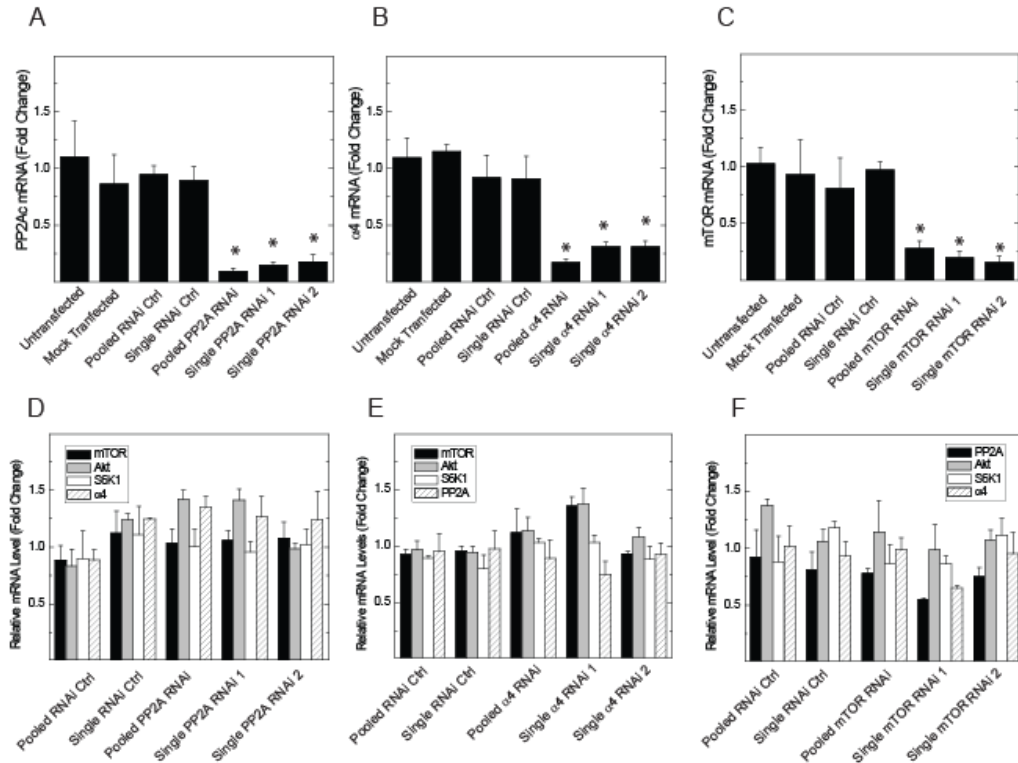

Supplementary Figure 3: RNA was purified from untransfected A549 cells, or those that were mock-transfected (transfection reagent alone) or siRNA-transfected for 72 h. Preparations of siRNA duplexes included single or pooled duplexes targeting mTOR (30 nM),  $\alpha 4$  (10 nM), or PP2Ac (10 nM) as indicated in Supplementary Table 1. mRNA levels of the indicated transcripts were detected by real-time PCR. Data are means of fold change in mRNA levels (untransfected controls = 1) from 3 individual experiments  $\pm$  SEM as determined by the  $\Delta\Delta CT$  method. \*  $p < 0.05$  vs. untransfected control.

Pooled siRNA mixes contain 4 individual siRNA duplexes (Pooled RNAi; Smartpool, Dharmacon). The pooled siRNA control mix contains 4 individual duplexes that do not target mRNAs in the human transcriptome. We obtained two single siRNA duplexes from each pooled siRNA mix, and compared their respective effects on mRNA levels to those of the pooled siRNAs. Panels A-C: Each single or pooled siRNA mixture effectively depletes its target transcript. Panels D-F: None of the single or pooled

siRNAs significantly reduce the levels of other transcripts that encode proteins in the mTOR signaling pathway. Data are means of fold change in mRNA levels (untransfected controls = 1) from 3 individual experiments  $\pm$  SEM. \*  $p < 0.05$  vs. untransfected control.

Supplementary Figure 4: Effect of single siRNA duplexes targeting mTOR,  $\alpha 4$ , or PP2Ac on IRF-1 induction by IFN- $\gamma$ :

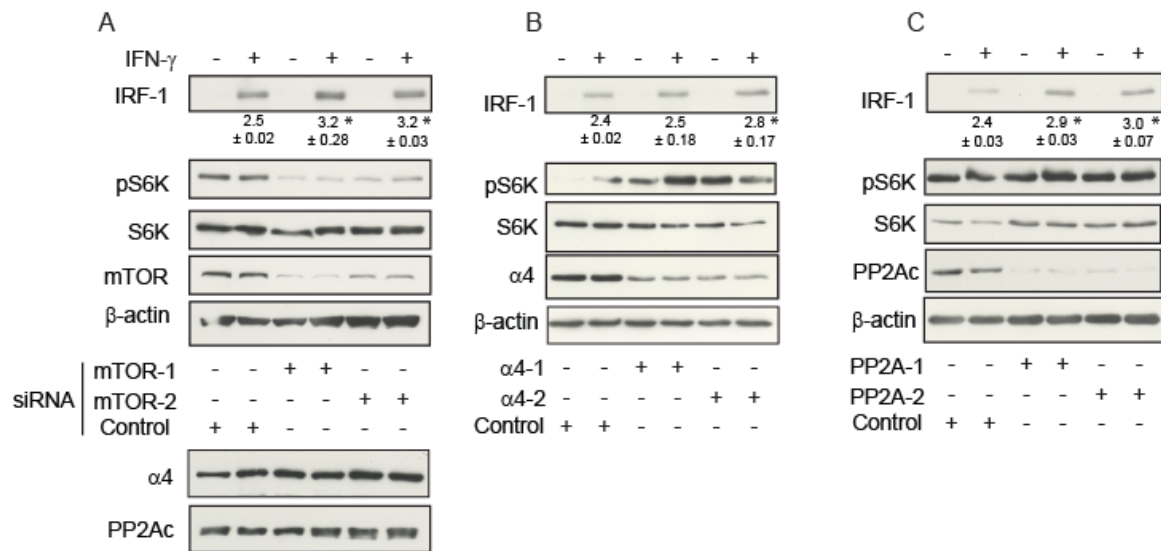

Supplementary Figure 4: A549 cells were transfected with non-targeting single siRNA duplex (Control) or those targeting A. mTOR (30 nM), B.  $\alpha 4$  (10 nM), or C. PP2Ac (10 nM) for 72 h before serum withdrawal for 1 h in the absence or presence of rapamycin, incubation without or with IFN- $\gamma$  for 2 h, and detection of the indicated proteins by Western blot. Sequences of the duplexes are recorded in Table S1. Mean integrated band density for IRF-1  $\pm$  SEM (\*  $p < 0.05$  targeting siRNA vs. non-targeting control,  $n=3-4$  individual experiments) is shown below each Western blot. \*  $p < 0.05$  vs. non-targeting control.

Although siRNA duplex mTOR-1 reduced  $\alpha 4$  and PP2Ac levels by 45% (Figure S4), protein levels were unaffected (Figure S5A, bottom panel). Duplex  $\alpha 4$ -1 was not as effective as  $\alpha 4$ -2 at reducing IRF-1 induction. As was the case for pooled siRNA (Fig. 5),  $\alpha 4$  and PP2Ac depletion with single duplexes enhanced phosphorylation of S6K; depletion of mTOR with single duplexes reduced phosphorylation of S6K.

Supplementary Tables:

Table S1: Dharmacon siRNA targets and source:

| siRNA target                       | Catalogue Number                      | Entrez Gene ID      |
|------------------------------------|---------------------------------------|---------------------|
| Pooled siRNA:                      |                                       |                     |
| PP2A $\alpha$                      | L-003598-01                           | 5515                |
| $\alpha$ 4                         | L-011298-00                           | 3476                |
| mTOR                               | L-003008-00                           | 2475                |
| siControl Non-Targeting siRNA Pool | D-001206-13                           | N/A                 |
| Single siRNA:                      |                                       |                     |
|                                    | Catalogue Number                      | Target Sequence     |
| PP2A $\alpha$ -1                   | J-003598-9                            | ccggaauguaguaacgau  |
| PP2A $\alpha$ -2                   | J-003598-10                           | acaauaacaccucgugaau |
| $\alpha$ 4-1                       | J-011298-06                           | gcuaucauguggcagaguu |
| $\alpha$ 4-2                       | J-011298-07                           | gggcugaucuucccacaac |
| mTOR-1                             | J-003008-11                           | ggccauagcuagccucaua |
| mTOR-2                             | J-003008-12                           | caaaggacuucgcccauaa |
| siControl                          | On-Target plus Non-targeting siRNA #1 | ugguuuacaugucgacuaa |

Table S2: Antibodies used for Western blot analysis or immunoprecipitations:

| Protein                                   | Source                    |
|-------------------------------------------|---------------------------|
| Rabbit anti-STAT1 (Western)               | Santa Cruz Biotechnology  |
| Mouse anti-STAT1 $\alpha$ (IP or Western) | Santa Cruz Biotechnology  |
| phospho-STAT1 S727                        | Upstate                   |
| phospho-STAT1 Y701                        | Upstate                   |
| PKC $\delta$                              | Santa Cruz Biotechnology  |
| Caspase-1                                 | Santa Cruz Biotechnology  |
| IRF-1                                     | Santa Cruz Biotechnology  |
| $\beta$ -actin                            | Sigma                     |
| GST                                       | Santa Cruz Biotechnology  |
| $\alpha$ 4                                | Upstate                   |
| mTOR                                      | Upstate                   |
| PP2Ac                                     | Cell Signaling Technology |
| 4E-BP1                                    | Cell Signaling Technology |
| mLST8                                     | Cell Signaling Technology |
| p70 S6 kinase                             | Cell Signaling Technology |
| phospho-p70 S6 kinase T389                | Cell Signaling Technology |
| Enolase                                   | Santa Cruz                |
| Acetylated histone H3                     | Upstate                   |
| Rheb                                      | Cell Signaling Technology |
| Rabbit anti-myc (IP)                      | Upstate                   |

|                          |                |
|--------------------------|----------------|
| Mouse anti-myc (Western) | Upstate        |
| Phospho-Akt S473         | Cell Signaling |
| Akt                      | Cell Signaling |



Table S3: Oligonucleotide primers (5'-3') for PCR cloning of STAT1, PKC $\delta$ , and PP2A into Gateway entry vector pDONR-221:

| Transcript               | Forward Primer                                                            | Reverse Primer                                                           | Template                          |
|--------------------------|---------------------------------------------------------------------------|--------------------------------------------------------------------------|-----------------------------------|
| STAT1-WT                 | ggggacaagttgtacaaa<br>aaagcaggctgtatgtctc<br>agtggtagcaacttcagcg<br>cagcg | ggggaccactttgtacaa<br>gaaagctgggtcctatact<br>gtgtcatcatactgtcgaa<br>ttct | human lung cDNA                   |
| PKC $\delta$             | ggggacaagttgtacaaa<br>aaagcaggctatggcgcc<br>gttctcg                       | ggggaccactttgtacaa<br>gaaagctgggttctaacc<br>ggaacctccatcttc              | pcDNA3.1 - PKC $\delta$ - WT      |
| PP2A $\alpha$ - WT       | ggggacaagttgtacaaa<br>aaagcaggcttcatggacg<br>agaaggtgtcacca               | ggggaccactttgtacaa<br>gaaagctgggtcttacag<br>gaagaagtctgggta              | pcDNA3 – PP2A $\alpha$ -<br>WT    |
| PP2A $\alpha$ -<br>Y307F | ggggacaagttgtacaaa<br>aaagcaggcttcatggacg<br>agaaggtgtcacca               | ggggaccactttgtacaa<br>gaaagctgggtcttacag<br>gaagaagtctgggta              | pcDNA3 – PP2A $\alpha$ -<br>Y307F |

Table S4: Oligonucleotide primers (5'-3') for Sybr Green-based Real-time PCR:

| Transcript    | Forward Primer            | Reverse Primer            |
|---------------|---------------------------|---------------------------|
| STAT1         | tccatcctttggtacaacatgc    | cagagagggagcaggtgttt      |
| IRF1          | gctgggacatcaacaaggat      | gtggaagcatccggtagact      |
| 45S rRNA      | aacgcctgacacgcacggcacggag | cctgctgttctctcgcgcgtccgag |
| PP2A $\alpha$ | ggtggcaaatcaccagatac      | tctcatgattccctcgaaga      |
| $\alpha$ 4    | aattcctccatggcttatcc      | cacagcagatttcattgcag      |
| mTOR          | gcatccagattgatacctg       | tgtctgtgagaagctggtga      |
| Akt           | gaagagatggagggtgtcct      | atcttcatggcgtagtagcg      |
| S6K           | agcacagcaaatcctcagac      | tcattgtcacatccatctgc      |
| GAPDH         | aagaaggtggtgaagcaggcg     | accaggaaatgagcttgaaa      |

Table S5: Probes for Taqman-based Real-time PCR:

| Transcript | Entrez Gene ID | ABI Catalogue Number |
|------------|----------------|----------------------|
| hiNOS      | 4843           | HS00167257_m1        |
| hCasp1     | 834            | HS00354836_m1        |
| Fas        | 355            | HS00163653_m1        |
| 18S RNA    | 100008588      | 4352930E             |
