# Supplementary material
Source: PubMed Central journal article supplement (PMC2782027)
Supplement: supp_M109.033530_jbc.M109.033530-2.pdf [file supp_M109.033530_jbc.M109.033530-2.pdf]

Supplementary Figure 1: Effect of Dominant-negative mTOR on the Phosphorylation of STAT1:

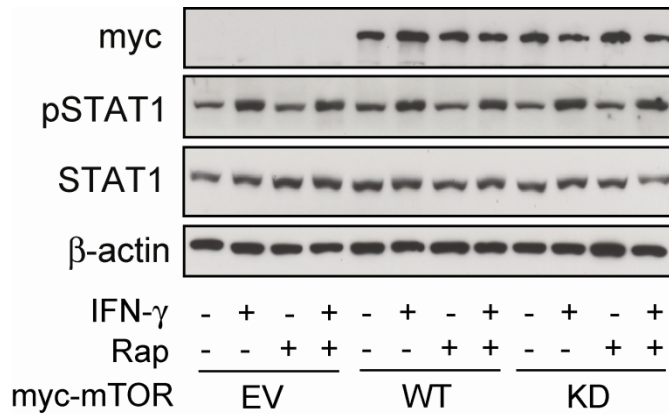

Supplementary Figure 1: HEK 293T cells expressing myc-tagged wild-type (WT) or kinase-dead (KD) mTOR, were serum-deprived for 1 h in the absence or presence of rapamycin before incubation without or with IFN- $\gamma$  for 30 min. Proteins from whole cell lysates were separated by SDS-PAGE and detected by Western blot analysis. Samples from the same experiment were used for immunoprecipitation of myc-mTOR-associated proteins (Figure 1E). Results are representative of 3 individual experiments.
