# Supplementary material
Source: PubMed Central journal article supplement (PMC2782027)
Supplement: supp_M109.033530_jbc.M109.033530-3.pdf [file supp_M109.033530_jbc.M109.033530-3.pdf]

Supplementary Figure 2: Protein Fragment Complementation Assay:

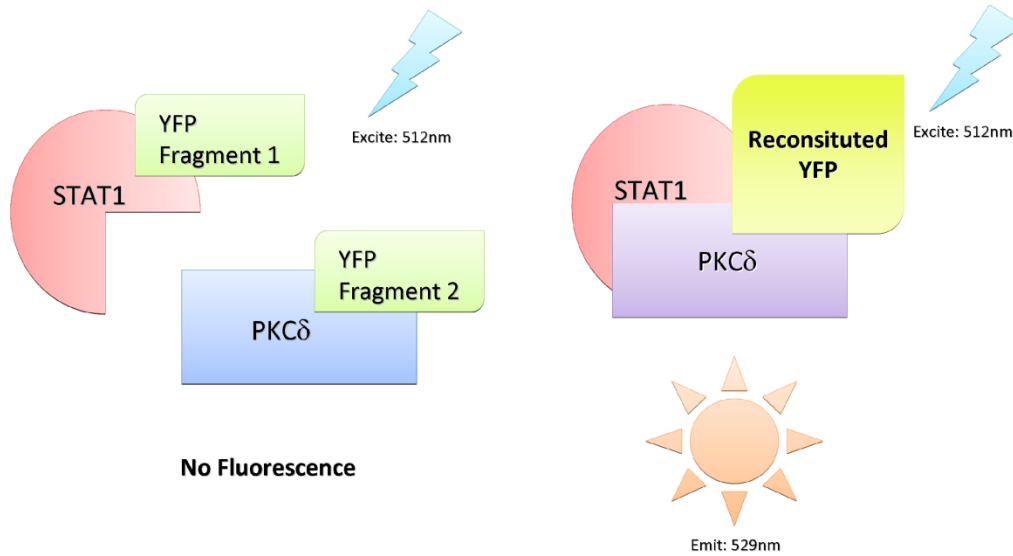

Supplementary Figure 2: STAT1 and PKC $\delta$ , each linked to complementary fragments of yellow fluorescent protein (YFP) were expressed in A549 cells. Physical interaction of the recombinant proteins leads to reconstitution of active YFP permitting detection by fluorescence microscopy.
