# Supplementary material
Source: PubMed Central journal article supplement (PMC2782027)
Supplement: supp_M109.033530_jbc.M109.033530-5.pdf [file supp_M109.033530_jbc.M109.033530-5.pdf]

Supplementary Figure 4: Effect of single siRNA duplexes targeting mTOR,  $\alpha 4$ , or PP2Ac on IRF-1 induction by IFN- $\gamma$ :

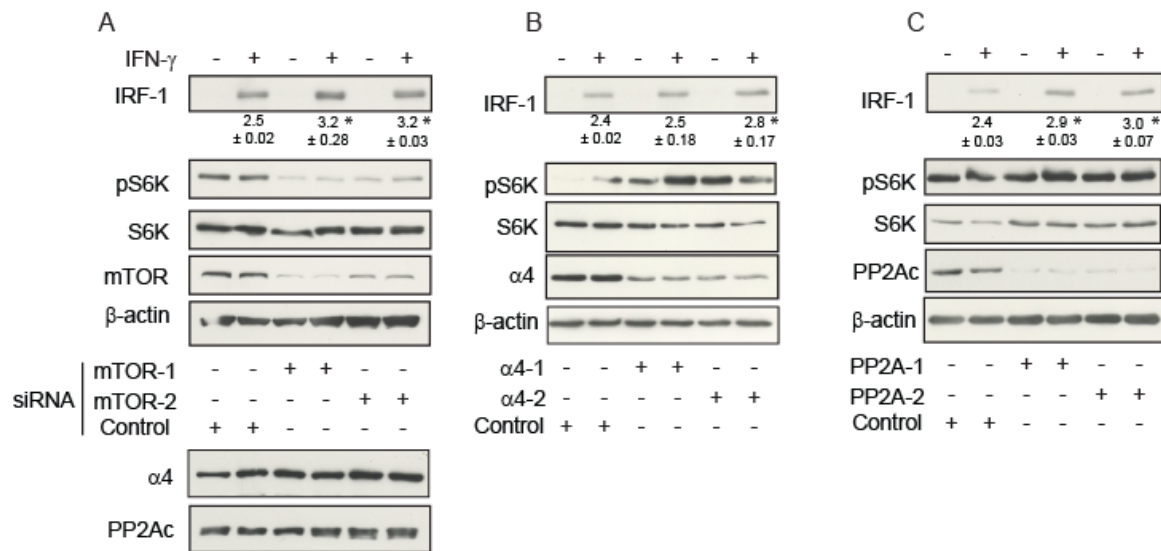

Supplementary Figure 4: A549 cells were transfected with non-targeting single siRNA duplex (Control) or those targeting A. mTOR (30 nM), B.  $\alpha 4$  (10 nM), or C. PP2Ac (10 nM) for 72 h before serum withdrawal for 1 h in the absence or presence of rapamycin, incubation without or with IFN- $\gamma$  for 2 h, and detection of the indicated proteins by Western blot. Sequences of the duplexes are recorded in Table S1. Mean integrated band density for IRF-1  $\pm$  SEM (\*  $p < 0.05$  targeting siRNA vs. non-targeting control,  $n=3-4$  individual experiments) is shown below each Western blot. \*  $p < 0.05$  vs. non-targeting control.

Although siRNA duplex mTOR-1 reduced  $\alpha 4$  and PP2Ac levels by 45% (Figure S4), protein levels were unaffected (Figure S5A, bottom panel). Duplex  $\alpha 4$ -1 was not as effective as  $\alpha 4$ -2 at reducing IRF-1 induction. As was the case for pooled siRNA (Fig. 5),  $\alpha 4$  and PP2Ac depletion with single duplexes enhanced phosphorylation of S6K; depletion of mTOR with single duplexes reduced phosphorylation of S6K.
